# Supplementary material
Source: PubMed Central journal article supplement (PMC7964339)
Supplement: 2679_materials.pdf [file 2679_materials.pdf]

## On-line Supplementary Material

### Section 1: Postprocessing Method

Postprocessing of the EPI signal included both spatial smoothing and temporal alignment. Spatial smoothing was applied using a full width at half maximum Gaussian kernel. Eight-mm smoothing was applied to 1.5T datasets that were acquired with 6-mm sections and 1-mm skip. Six-mm smoothing was applied to the 3T data that was acquired with 5-mm section thickness. Temporal alignment was done with the Analysis of Functional Neuro-Images (AFNI, Cox, 1996) 3dTshift function that shifts voxel time series from the input dataset so that the separate sections are aligned to the same temporal origin and helped account for differences in temporal acquisition at each section location within the 2-second TR. AFNI 3Dvolreg was used to correct for head motion in the reconstructed time courses. This was done by spatially coregistering all data to the middle time point of the fMRI run. The EPIs were coregistered with structural images. They were manually moved for perceived optimal spatial coregistration with the corresponding 3D anatomy. The AFNI plug-in “nudge dataset” allowed visualization in 3 planes of the anatomy with an overlay showing the EPI volume. This was applied in 6 planes to align the disparate EPI and anatomic datasets into a best fit. Once 1 of the EPI datasets was thus manually aligned, all the other EPI datasets from the same scan session were automatically coregistered using AFNI 3dvolreg.

Cox R. AFNI: Software for analysis and visualization of functional magnetic resonance neuroimages. *Comput Biomed Res* 1996;29:162–73

### Section 2: Supplemental Results

On-line Fig 1. Example of motor LAD measurement. This illustrates an example of the distance measurement made from tumor margin to periphery of functional activation in a patient with a Grade III, right frontoparietal astrocytoma ( $t > 10$ ). The yellow arrow demarcates the right inferior/lateral primary sensorimotor cortex, while the pink arrow defines the distance of interest (ie LAD).

On-line Fig 2. Kaplan-Meier curves for the motor patient population. (Logrank test,  $P = .018$ ) Kaplan-Meier curves for the motor data indicates survival time for patients with either preoperative or postoperative motor deficit (blue) was significantly longer (mean = 2233 days, 95% CI = 1958–2508 days) than for patients with both preoperative and postoperative motor deficits (green; mean = 1544 days, 95% CI = 1046 to 2042; Mantel-Cox Logrank test,  $\chi^2 = 5.61$ ,  $P = .018$ ).

On-line Fig 3. Kaplan-Meier curves for the language patient population. (Logrank test,  $P = .079$ ) Kaplan-Meier analysis indicates that survival time for patients with either preoperative or postoperative deficit (blue) was longer (mean = 2306 days, 95% CI = 2013–2599 days) than for patients with both preoperative and postoperative deficits (green; mean = 1282 days, 95% CI = 847–1718 days), however, this difference only trended towards significance (Mantel-Cox Logrank test,  $\chi^2 = 3.08$ ,  $P = .079$ ).

[1] Note that not all patients underwent breath-holding scans because the database is 10 years old. More recent patients underwent breathholding scans regardless of diagnosis.

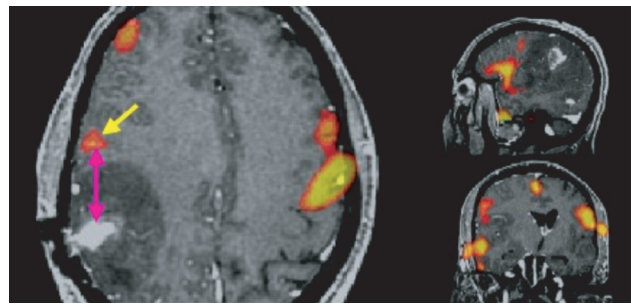

**Fig S1.** Example of motor LAD measurement. This illustrates an example of the distance measurement made from tumor margin to periphery of functional activation in a patient with a Grade III, right fronto-parietal astrocytoma ( $t > 10$ ). The yellow arrow demarcates the right inferior/lateral primary sensorimotor cortex, while the pink arrow defines the distance of interest (i.e. LAD).

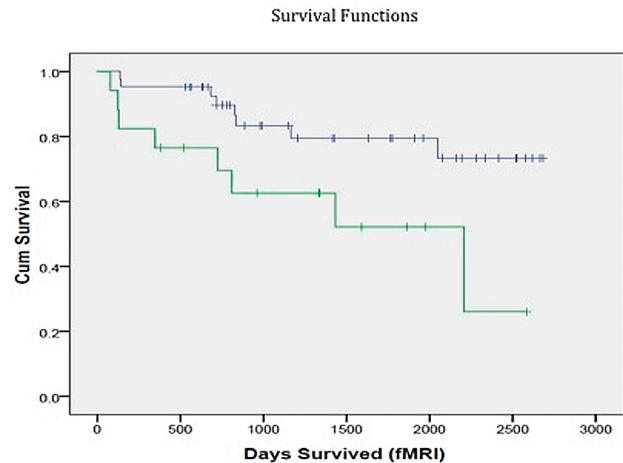

**Fig S2.** Kaplan-Meier curves for the motor patient population. (Log Rank test,  $P = .018$ ) Kaplan-Meier curves for the motor data indicates survival time for patients with either preoperative or postoperative motor deficit (blue) was significantly longer (mean = 2233 days, 95% CI = 1958 to 2508 days) than for patients with both preoperative and postoperative motor deficits (green; mean = 1544 days, 95% CI = 1046 to 2042; Mantel-Cox Log-Rank test,  $\chi^2 = 5.61$ ,  $P = .018$ ).

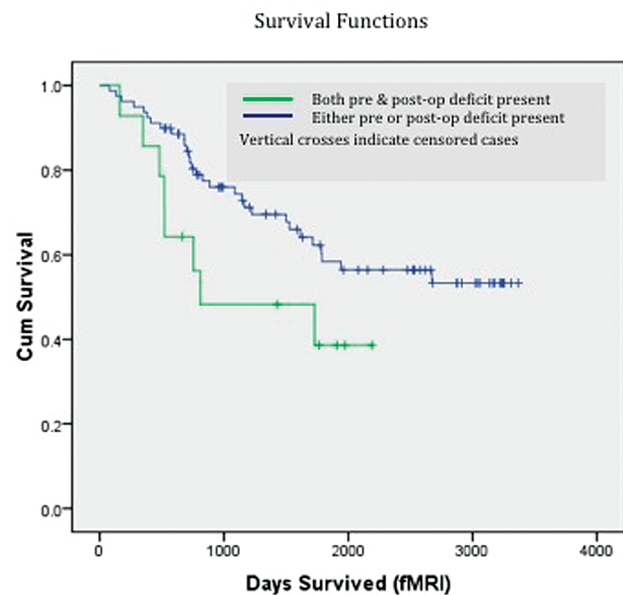

**Fig S3.** Kaplan-Meier curves for the language patient population. (Log Rank test,  $P = .079$ ) Kaplan-Meier analysis indicates that survival time for patients with either preoperative or postoperative deficit (blue) was longer (mean = 2306 days, 95% CI = 2013 to 2599 days) than for patients with both preoperative and postoperative deficits (green; mean = 1282 days, 95% CI = 847 to 1718 days), however, this difference only trended towards significance (Mantel-Cox Log-Rank test,  $\chi^2 = 3.08$ ,  $P = .079$ ).

**On-line Table 1: Patient clinical data**

| Patient | Handedness | Age | Sex | Tumor Location      | Surgical Pathology Diagnosis                           | Motor | Language | Breath-holding <sup>1</sup> |
|---------|------------|-----|-----|---------------------|--------------------------------------------------------|-------|----------|-----------------------------|
|         |            |     |     |                     |                                                        | Task  | Task     |                             |
| 1       | R          | 68  | F   | R parietal          | Metastatic adenocarcinoma                              | Y     | Y        | N                           |
| 2       | R          | 45  | F   | L frontal           | Meningioma                                             | Y     | Y        | N                           |
| 3       | R          | 40  | M   | L frontotemporal    | Oligodendroglioma Grade II                             | Y     | Y        | N                           |
| 4       | R          | 6   | M   | L temporal          | Gangliocytoma                                          | Y     | Y        | N                           |
| 5       | L          | 31  | F   | R frontal           | Oligodendroglioma Grade III                            | Y     | Y        | N                           |
| 6       | L          | 24  | M   | L temporal          | Oligoastrocytoma Grade II                              | Y     | Y        | N                           |
| 7       | R          | 57  | M   | R temporal          | Gliosis, mild cerebral white matter                    | Y     | Y        | N                           |
| 8       | R          | 41  | F   | L frontal           | Oligodendroglioma Grade II                             | Y     | Y        | N                           |
| 9       | L          | 45  | F   | R frontal           | Oligodendroglioma Grade III                            | Y     | Y        | N                           |
| 10      | R          | 57  | M   | L temporal          | Dysembryoplastic neuroepithelial tumor                 | N     | Y        | N                           |
| 11      | R          | 37  | F   | L frontal           | Oligodendroglioma Grade II                             | Y     | Y        | N                           |
| 12      | R          | 24  | F   | R frontoparietal    | Astrocytoma Grade III                                  | Y     | Y        | N                           |
| 13      | R          | 49  | M   | L temporal          | Oligodendroglioma                                      | N     | Y        | N                           |
| 14      | R          | 33  | M   | R frontal           | Oligodendroglioma Grade II                             | Y     | Y        | N                           |
| 15      | L          | 64  | M   | R temporal          | Astrocytoma Grade IV                                   | N     | Y        | N                           |
| 16      | R          | 60  | M   | L frontal           | Oligodendroglioma Grade II                             | Y     | Y        | N                           |
| 17      | R          | 54  | F   | L temporal          | No biopsy                                              | N     | Y        | N                           |
| 18      | L          | 39  | M   | R parietal          | Oligodendroglioma Grade II                             | Y     | Y        | N                           |
| 19      | R          | 41  | F   | L frontotemporal    | Benign meningioma                                      | Y     | Y        | N                           |
| 20      | R          | 26  | M   | L temporal          | Astrocytoma Grade IV                                   | N     | Y        | N                           |
| 21      | R          | 57  | F   | L temporal          | Astrocytoma Grade IV                                   | N     | Y        | N                           |
| 22      | R          | 45  | M   | R frontal           | Oligodendroglioma Grade II                             | Y     | Y        | N                           |
| 23      | R          | 56  | M   | L frontal           | Oligodendroglioma Grade II                             | Y     | Y        | N                           |
| 24      | R          | 69  | F   | L frontal           | Metastatic breast carcinoma                            | Y     | Y        | N                           |
| 25      | R          | 42  | F   | L frontotemporal    | Meningioma                                             | Y     | Y        | N                           |
| 26      | L          | 34  | F   | L frontal           | Minimally abnormal/hypercellular cerebral white matter | Y     | Y        | N                           |
| 27      | R          | 27  | M   | L frontal           | Astrocytoma Grade III                                  | Y     | Y        | N                           |
| 28      | R          | 21  | M   | L frontal           | Astrocytoma Grade II                                   | Y     | Y        | N                           |
| 29      | R          | 53  | M   | L frontal           | Oligodendroglioma Grade II                             | Y     | Y        | N                           |
| 30      | R          | 23  | M   | L frontal           | Oligoastrocytoma Grade III                             | Y     | Y        | N                           |
| 31      | R          | 28  | M   | L frontal           | Oligoastrocytoma Grade II                              | Y     | Y        | N                           |
| 32      | R          | 56  | M   | L frontal           | Astrocytoma Grade IV                                   | Y     | Y        | N                           |
| 33      | R          | 21  | F   | R temporal          | Dysembryoplastic neuroectodermal tumor                 | Y     | Y        | N                           |
| 34      | —          | 25  | M   | L temporal          | Astrocytoma Grade II                                   | Y     | Y        | N                           |
| 35      | R          | 60  | M   | L temporal          | Astrocytoma Grade IV                                   | Y     | Y        | N                           |
| 36      | L          | 8   | M   | L frontal           | Primitive neuroectodermal tumor                        | Y     | Y        | N                           |
| 37      | R          | 43  | M   | L temporal          | Astrocytoma Grade IV                                   | Y     | Y        | N                           |
| 38      | R          | 76  | F   | L temporal          | No biopsy                                              | Y     | Y        | N                           |
| 39      | L          | 51  | F   | R frontal           | Astrocytoma Grade IV                                   | Y     | Y        | N                           |
| 40      | —          | 70  | M   | R frontal           | Astrocytoma Grade IV                                   | Y     | N        | N                           |
| 41      | R          | 42  | F   | L frontal           | No biopsy                                              | Y     | Y        | N                           |
| 42      | R          | 68  | F   | R frontal           | No biopsy                                              | Y     | N        | N                           |
| 43      | R          | 52  | M   | L temporal          | Astrocytoma Grade IV                                   | Y     | Y        | N                           |
| 44      | —          | 51  | M   | L frontal           | Astrocytoma Grade IV                                   | Y     | Y        | N                           |
| 45      | R          | 31  | F   | R frontal           | Astrocytoma Grade III                                  | Y     | Y        | N                           |
| 46      | R          | 29  | M   | L parieto-occipital | Oligodendroglioma Grade III                            | Y     | Y        | N                           |
| 47      | R          | 63  | M   | L parietal          | Metastatic carcinoma                                   | Y     | Y        | N                           |
| 48      | R          | 43  | F   | L parietal          | Astrocytoma Grade IV                                   | Y     | N        | N                           |
| 49      | R          | 49  | M   | L temporal          | Astrocytoma Grade IV                                   | Y     | Y        | N                           |
| 50      | R          | 70  | M   | L temporal          | Astrocytoma Grade IV                                   | N     | Y        | N                           |
| 51      | R          | 68  | M   | L parietal          | Astrocytoma Grade IV                                   | Y     | Y        | N                           |
| 52      | L          | 46  | M   | R frontal           | Astrocytoma Grade II                                   | Y     | Y        | N                           |
| 53      | L          | 76  | M   | R frontal           | Astrocytoma Grade IV                                   | Y     | Y        | N                           |
| 54      | R          | 65  | F   | L frontal           | Astrocytoma Grade IV                                   | Y     | Y        | N                           |
| 55      | R          | 30  | F   | L frontal           | Astrocytoma Grade III                                  | Y     | Y        | N                           |
| 56      | R          | 86  | F   | L parietal          | Meningioma                                             | Y     | Y        | N                           |
| 57      | R          | 57  | M   | L frontal           | Astrocytoma Grade IV                                   | Y     | Y        | N                           |
| 58      | R          | 70  | F   | L frontal           | Metastatic clear cell carcinoma                        | Y     | N        | N                           |
| 59      | A          | 49  | F   | R frontal           | Meningioma                                             | Y     | Y        | N                           |
| 60      | R          | 28  | M   | R parietal          | Astrocytoma Grade IV                                   | Y     | N        | N                           |

**On-line Table 1: Patient clinical data (Continued)**

| Patient | Handedness | Age | Sex | Tumor Location             | Surgical Pathology Diagnosis           | Motor | Language | Breath-holding <sup>1</sup> |
|---------|------------|-----|-----|----------------------------|----------------------------------------|-------|----------|-----------------------------|
|         |            |     |     |                            |                                        | Task  | Task     |                             |
| 61      | R          | 46  | M   | R frontal                  | Oligodendroglioma Grade II             | Y     | Y        | N                           |
| 62      | R          | 66  | M   | L frontal                  | Astrocytoma Grade III                  | Y     | Y        | N                           |
| 63      | R          | 65  | M   | L parietal                 | Astrocytoma Grade IV                   | Y     | Y        | N                           |
| 64      | –          | 49  | M   | L frontoparietal           | Oligoastrocytoma Grade II              | Y     | Y        | N                           |
| 65      | R          | 32  | F   | L insula (parietotemporal) | Oligodendroglioma Grade II             | Y     | Y        | N                           |
| 66      | L          | 36  | F   | R temporal                 | Ganglioma                              | N     | Y        | N                           |
| 67      | R          | 54  | M   | R frontal                  | Oligoastrocytoma Grade II              | Y     | Y        | N                           |
| 68      | R          | 53  | F   | L frontotemporal           | Oligodendroglioma Grade III            | Y     | Y        | N                           |
| 69      | L          | 55  | M   | R frontal                  | Oligodendroglioma                      | Y     | Y        | N                           |
| 70      | R          | 65  | M   | L temporal                 | Astrocytoma Grade IV                   | N     | Y        | N                           |
| 71      | L          | 48  | M   | L frontal                  | Astrocytoma Grade IV                   | Y     | Y        | N                           |
| 72      | R          | 56  | M   | L parietal                 | Oligodendroglioma Grade II             | Y     | Y        | N                           |
| 73      | R          | 28  | M   | L frontal                  | Astrocytoma Grade III                  | Y     | Y        | N                           |
| 74      | R          | 43  | M   | L temporal                 | Oligodendroglioma Grade II             | Y     | Y        | N                           |
| 75      | R          | 44  | F   | L parietal                 | Astrocytoma Grade IV                   | Y     | Y        | N                           |
| 76      | L          | 29  | M   | R temporal                 | Oligoastrocytoma Grade II              | N     | Y        | Y                           |
| 77      | L          | 48  | M   | R frontoparietal           | Astrocytoma Grade III                  | Y     | Y        | N                           |
| 78      | A          | 51  | M   | R frontal                  | Astrocytoma Grade IV                   | Y     | Y        | Y                           |
| 79      | L          | 57  | M   | R frontal                  | Metastatic colonic adenocarcinoma      | Y     | Y        | Y                           |
| 80      | R          | 55  | M   | L temporal                 | Astrocytoma Grade IV                   | N     | Y        | Y                           |
| 81      | L          | 59  | M   | R temporal                 | No biopsy                              | Y     | Y        | Y                           |
| 82      | –          | 43  | M   | R frontal                  | No biopsy                              | Y     | Y        | Y                           |
| 83      | R          | 35  | F   | L temporal                 | Dysembryoplastic neuroepithelial tumor | Y     | Y        | Y                           |
| 84      | L          | 26  | F   | L frontal                  | Astrocytoma Grade IV                   | Y     | Y        | N                           |
| 85      | R          | 28  | M   | L frontal                  | Astrocytoma Grade III                  | Y     | Y        | N                           |
| 86      | R          | 51  | F   | L frontal                  | Astrocytoma Grade II                   | Y     | Y        | Y                           |
| 87      | R          | 33  | F   | L occipital                | Astrocytoma Grade IV                   | N     | Y        | N                           |
| 88      | R          | 43  | F   | R frontal                  | Astrocytoma Grade III                  | Y     | Y        | Y                           |
| 89      | R          | 67  | M   | L frontal                  | Astrocytoma Grade IV                   | Y     | Y        | Y                           |
| 90      | R          | 49  | M   | L temporal                 | No biopsy                              | Y     | Y        | N                           |
| 91      | R          | 27  | M   | R frontal                  | Astrocytoma Grade IV                   | Y     | Y        | Y                           |

<sup>1</sup> Note that not all patients underwent breath-holding scans because the data base is 10 years old and standardized protocols had not been established. More recent patients underwent breath-holding scans regardless of diagnosis. R = right-handed; L = left-handed; A = ambidextrous; Y = patient underwent the indicated task during scanning, N = patient did not undergo the indicated task during scanning.

**On-line Table 2: Demographics of patients who underwent surgery**

| Characteristic                                                                       | <1 cm       | 1–2 cm      | 2+ cm       | P value |
|--------------------------------------------------------------------------------------|-------------|-------------|-------------|---------|
| Characteristics of patients based on distance between lesion and SMC                 |             |             |             |         |
| Number of subjects (n=64)                                                            | 26          | 14          | 24          | 0.14    |
| Male (%)                                                                             | 61          | 57          | 75          | 0.14    |
| Handedness (% right)                                                                 | 64          | 93          | 82          | 0.23    |
| Average age (years)                                                                  | 49 +/- 17.0 | 44 +/- 12.9 | 40 +/- 15.6 | 0.15    |
| Grade III or IV tumors (%)                                                           | 65          | 50          | 42          | 0.23    |
| Characteristics of patients based on distance of lesion from Broca or Wernicke areas |             |             |             |         |
| Number of subjects (n=67)                                                            | 25          | 12          | 30          | 0.01    |
| Male (%)                                                                             | 64          | 75          | 60          | 0.65    |
| Handedness (% right)                                                                 | 84          | 67          | 77          | 0.54    |
| Average age (years)                                                                  | 44 +/- 14   | 36 +/- 17   | 50 +/- 16   | 0.05    |
| Grade III or IV tumors (%)                                                           | 52          | 58          | 50          | 0.88    |

**On-line Table 3: Univariate analysis: Results for subset of patients who underwent surgery**

| Characteristic                                       | <1 | 1–2 | 2+ | P value |
|------------------------------------------------------|----|-----|----|---------|
| SMC LAD vs motor deficits                            |    |     |    |         |
| With pre- or postoperative paresis (%) (n=64)        | 80 | 50  | 8  | 0.0001  |
| Broca and/or Wernicke areas LAD vs language deficits |    |     |    |         |
| With pre- or postoperative aphasia (%) (n=67)        | 68 | 25  | 30 | 0.007   |

LAD = lesion to activation distance

**On-line Table 4: Broca versus Wernicke aphasia**

| Characteristic                         | <1 | 1–2 | 2+ | P value |
|----------------------------------------|----|-----|----|---------|
| Broca area LAD vs aphasia              |    |     |    |         |
| With pre- or postoperative aphasia (%) | 71 | 36  | 35 | 0.01    |
| Wernicke area LAD vs aphasia           |    |     |    |         |
| With pre- or postoperative aphasia (%) | 73 | 54  | 44 | 0.28    |

LAD = lesion to activation distance

**On-line Table 5: Survival analysis using Cox-proportional hazards**

| Parameter*                                                                                    | P value | HR (95.0% CI)          |
|-----------------------------------------------------------------------------------------------|---------|------------------------|
| Motor distance (<1 cm, 1–2 cm, >2 cm)                                                         |         |                        |
| SMC LAD                                                                                       |         |                        |
| Dist 2 vs 1                                                                                   | 0.648   | 1.281 (0.443–3.705)    |
| Dist 3 vs 1                                                                                   | 0.280   | 0.537 (0.174–1.660)    |
| Dist 3 vs 2                                                                                   | 0.155   | 2.386 (0.721–7.898)    |
| Language Distance (<1 cm, 1–2 cm, >2 cm)                                                      |         |                        |
| Broca LAD                                                                                     |         |                        |
| Dist 2 vs 1                                                                                   | 0.112   | 2.779 (0.789–9.783)    |
| Dist 3 vs 1                                                                                   | 0.085   | 2.886 (0.863–9.650)    |
| Dist 3 vs 2                                                                                   | 0.913   | 0.963 (0.487–1.902)    |
| Wernicke LAD                                                                                  |         |                        |
| Dist 2 vs 1                                                                                   | 0.384   | 0.625 (0.217–1.802)    |
| Dist 3 vs 1                                                                                   | 0.403   | 0.709 (0.317–1.587)    |
| Dist 3 vs 2                                                                                   | 0.783   | 0.881 (0.358–2.165)    |
| Either language area LAD                                                                      |         |                        |
| Dist 2 vs 1                                                                                   | 0.991   | 1.005 (0.426–2.368)    |
| Dist 3 vs 1                                                                                   | 0.466   | 1.335 (0.614–2.903)    |
| Dist 3 vs 2                                                                                   | 0.459   | 0.752 (0.354–1.597)    |
| Motor deficits                                                                                |         |                        |
| Pre-op deficit present (*no, yes)                                                             | 0.051   | 2.624 (0.987–6.978)    |
| Post-op deficit present (*no deficit n=34; transient deficits n=11; persistent deficits n=14) |         |                        |
| Transient                                                                                     | 0.404   | 0.412 (0.051–3.311)    |
| Persistent                                                                                    | 0.022   | 3.159 (1.183–8.435)    |
| Both pre- and post-op deficit present (*no, yes)                                              | 0.025   | 3.100 (1.156–8.308)    |
| Language deficits                                                                             |         |                        |
| Pre-op deficit present (*no, yes)                                                             | 0.290   | 1.523 (0.719–3.224)    |
| Post-op deficit present (*no deficit, transient, persistent)                                  |         |                        |
| Transient                                                                                     | 0.597   | 0.772 (0.295–2.017)    |
| Persistent                                                                                    | 0.133   | 1.908 (0.821–4.437)    |
| Both pre- and post-op deficit present (*no, yes)                                              | 0.085   | 1.993 (0.909–4.370)    |
| Motor tumor characteristics                                                                   |         |                        |
| Hemisphere (*L, R)                                                                            | 0.861   | 1.087 (0.427–2.771)    |
| Tumor location by lobes (F–frontal, O–other, P–parietal, T–temporal)                          |         |                        |
| Temporal vs F                                                                                 | 0.332   | 1.814 (0.545–6.038)    |
| Parietal vs F                                                                                 | 0.036   | 3.172 (1.081–9.310)    |
| Other vs F                                                                                    | 0.451   | 0.448 (0.056–3.607)    |
| Parietal vs T                                                                                 | 0.326   | 1.959 (0.512–7.491)    |
| Other vs T                                                                                    | 0.168   | 0.212 (0.023–1.925)    |
| Grade                                                                                         |         |                        |
| Grade 3 vs Grade 1 and 2                                                                      | 0.009   | 8.791 (1.723–44.858)   |
| Grade 4 vs Grade 1 and 2                                                                      | <0.001  | 42.485 (7.684–234.889) |
| Language tumor characteristics                                                                |         |                        |
| Hemisphere (*L, R)                                                                            | 0.423   | 1.315 (0.673–2.567)    |
| Lobe by lobe (*1-Frontal)                                                                     |         |                        |
| 2–Temporal                                                                                    | 0.339   | 1.458 (0.672–3.163)    |
| 3–Parietal                                                                                    | 0.121   | 2.083 (0.823–5.270)    |
| 4–Other                                                                                       | 0.543   | 0.734 (0.272–1.985)    |
| Grade (Grade 1, 2, 3, 4)                                                                      |         |                        |
| Grade 2 vs Grade 1                                                                            | 0.792   | 1.246 (0.242–6.425)    |
| Grade 3 vs Grade 1                                                                            | 0.027   | 5.467 (1.210–24.713)   |
| Grade 4 vs Grade 1                                                                            | 0.001   | 12.958 (3.011–55.769)  |
| Grade 3 vs Grade 2                                                                            | 0.006   | 4.367 (1.514–12.590)   |
| Grade 4 vs Grade 2                                                                            | <0.001  | 10.327 (3.849–27.709)  |
| Grade 4 vs Grade 3                                                                            | 0.028   | 2.290 (1.096–4.785)    |

\* reference category; LAD=lesion to activation distance; L = left; R=right; LAD code: LAD &lt;1 cm = Dist1; LAD 1–2 cm = Dist2; LAD &gt;2cm = Dist3

**On-line Table 6: Models with interactions**

|                                                               | <i>P</i> value (Overall) |
|---------------------------------------------------------------|--------------------------|
| Motor interactions                                            |                          |
| Distance X tumor grade (Grades 1 and 2 collapsed)             | 0.216                    |
| LAD X tumor location                                          | 0.057                    |
| LAD X pre-op deficit                                          | 0.119                    |
|                                                               | 0.777                    |
| LAD X post-op deficit (no deficit, transient,<br>*persistent) | 0.719<br>0.803           |
| Language interactions                                         |                          |
| LAD X grade                                                   | <0.001                   |
| LAD X tumor location                                          | 0.376                    |
| LAD X pre-op deficit                                          | 0.438                    |
| LAD X post-op deficit                                         | 0.624                    |

\* reference category; LAD = lesion to activation distance
